# Supplementary material for: The Pathologic Peritoneal Cancer Index (PCI) Strongly Differs From the Surgical PCI in Peritoneal Metastases Arising From Various Primary Tumors
Source: Springer Nature journal article supplement (doi:10.1245/s10434-020-08234-x), 2020-02-10
Supplement: MOESM3 [file 17666994]

**Supplement 3- DATA COLLECTION FORM**

**Patterns of peritoneal dissemination from various primary tumors**

**Table 1 Summary of clinical details, treatments and outcomes**

| **Demographic information** |
| --- |
| Given name/ First name (initials) _____ Family name/ Surname (initials) ______  Age (years) ______ Sex Male ____ Female _____  Center _______ City _______________ Country __________  Contact person _____________ E-mail _________________  Primary tumor site _____________________  Date of diagnosis _____________  Date of diagnosis of PM |
| **Relevant History** |
| Prior surgery – Diagnostic __________ Open______ Laparoscopic ________ (Date________)  Resection of primary tumor _____________________ (Date___________)  CRS _________ (Date___________)  Any other procedure ____________________ (Date___________) |
| Prior surgical score ______________ |
| Prior chemotherapy Yes___ / No_________  For primary_______ For PM __________  No of lines ______________  List the regimens ______________  Targetted therapy (name the drugs) _____________________  Date of completion of the last cycle ________________ |
| Prior IP chemotherapy Yes_________ No ___________  NIPS No of cycles __________ Drugs___________ Date of last cycle_____________  HIPEC Date_______ Drug___________________ Technique open______/ closed________  EPIC Date_________________ No of days________ Drug (s)__________________  PIPAC date_________ drugs________ no of cycles ______________ |
| **Clinical findings and Investigations** |
| ECOG performance status ____________  Albumin level _________ (mg/DL) |
| Pre operative tumor markers CEA________  CA- 19-9__________  CA- 125___________ |
| Histological diagnosis ___________  Primary tumor site __________  Grade ___________  Differentiation __________  LVI/ PNI __________  Synchronous/ metachronous |
| Staging laparoscopy yes______ no______  Predicted PCI ________  Assessment _____________________________________________ |
| Imaging MRI______ CT________ PET CT_______  Ascites_______  Lymphadenopathy__________  Other sites of metastases___________  Radiological PCI___________ |
| **Treatment STRATEGY (FOR OVARIAN CANCER)**  Primary CRS ________ NACT+ interval CRS  Reason for inoperability  Gross ascites  CC-0/1 resection not possible  Any other (please mention) ________________ |
| **Surgical Findings** |
| Date of surgery_______  Type CRS+/- HIPEC______ CRS alone_______ Palliative debulking_________ Aborted______ |
| PCI_____  CC-Score  HIPEC regimen __________  Duration_________ Method open______ Closed ________ |
| Ascitic fluid  Present___________ Quantity  Cytology_________ Immunohistochemistry____________________ |
| Peritonectomies  **Total parietal peritonectomy (TPP)______ Selective parietal peritonectomy (SPP) _____**  Right anteroparietal_________ Left anteroparietal _______  Pelvic________ Greater omentum_________ Lesser omentum_______  Right upper quadrant_________ Left upper quadrant ______________  Glisson’s capsulectomy _____________  Mesenteric peritonectomy total________ partial ________ site(s) ________________ |
| Visceral resections Total____  Primary tumor resection (procedure) _____________________________________  Uterus______ Ovaries and fallopian tubes right______ Left______  Colon - Hemicolectomy right_____ left______ subtotal colectomy ______ total colectomy____ Transverse colectomy______ sigmoid colectomy _______  Appendectomy _____________  Rectum AR_____ LAR________ APR________  Small bowel - sites_________________ length_______ number of resected segments_______  Stomach- distal_______ subtotal ________ total _________  Gall bladder______ Hepatic type_______ segments___________  Diaphragm resection- side_______________ diameter_________  Distal pancreatectomy ___________ Splenectomy___________  Anterior abdominal wall_____  Nephrectomy side______ total/partial_______  Ureteric resection side______ description________________________  Cystectomy extent__________________ site_________  Retroperitoneal tumor implantation Present _______ absent____________  Any other (please specify) ________ |
| Bowel anastomosis -Total no. ____________  Site___________ description_____________ hand sewn/ stapled ________  Site___________ description_____________ hand sewn/ stapled ________  Site___________ description_____________ hand sewn/ stapled ________  Site___________ description_____________ hand sewn/ stapled ________  Diverting stoma Yes_____ No _______ site______  Permanent stoma _________ |
| Lymphadenectomy  Pelvic________ Paraaortic (retroperitoneal)________ Level___________  Any other (please specify) _____________ |
| Duration of surgery (mins)______ Blood loss (ml) ____________  Blood transfusion _______  Post op ventilation yes___ no_____ Hours ________  ICU stay _________ Hospital stay________ |
| 30-day grade 3-4 morbidity ____________ 90-day grade 3-4 morbidity _______________  Mortality date________ cause ________________   | Complication | Grade | Management | Outcome | | --- | --- | --- | --- | |  |  |  |  | |  |  |  |  | |  |  |  |  | |  |  |  |  | |  |  |  |  | |
| Pathological findings (summary)  Diagnosis________________________________  Pathological stage___________________  Grade___________ Differentiation________________  Lymphvascular invasion________ Perineural invasion__________  Regional lymph nodes positive_______ Number________ Total no dissected _______  Peritoneal spread  Involved regions ____________________________________  Pathological PCI_____________________  Serosal involvement_______________  Bowel wall involvement__________  Regional nodes site___________ Positive no_______ Total number______________  Regional nodes site___________ Positive no_______ Total number______________  Regional nodes site___________ Positive no_______ Total number______________  Other sites of metastases  Liver _______ No________ Resected _______ Ablated________  Lung _______ no_________ Resected ______ Ablated ________ |
| Immunohistochemistry  Positive markers______________________  Negative markers______________________________ |
| Molecular markers (mutated/non mutated)  Kras_________ Braf__________ MSI_____________  P53____________ Ki67___________ Any other ________________ |
| Adjuvant therapy planned _________ not planned ___________  Date started _________ Delayed/ not delayed____________ |
| Last follow up  Date  Status Alive and disease free ___________  Alive with disease ____________  Dead due to disease _________  Dead due to other causes_________ |
| Mode of detection of recurrence  Tumor Marker rise__ ultrasound________ cross sectional imaging ______ |

Table 2 Detailed radiological PCI

| Region | Structure | Size of largest deposit | Other deposits present/absent | Fluid present/absent | Density (on CT scan) | Score (for the entire region) |
| --- | --- | --- | --- | --- | --- | --- |
| 0 | Midline incision |  |  |  |  |  |
| Anteroparietal peritoneum (Right) |  |  |  |  |
| Anteroparietal peritoneum (Left) |  |  |  |  |
| Greater omentum |  |  |  |  |
| Transverse colon |  |  |  |  |
| Transverse mesocolon |  |  |  |  |
| Gastrocolic ligament |  |  |  |  |
| 1 | Right hepatic surface |  |  |  |  |  |
| Diaphragm |  |  |  |  |
| Foramen of Winslow |  |  |  |  |
| Gall bladder |  |  |  |  |
| Hepatorenal recess |  |  |  |  |
| 2 | Left hepatic surface |  |  |  |  |  |
| Lesser omentum |  |  |  |  |
| Hepatic hilum |  |  |  |  |
| Falciform ligament |  |  |  |  |
| Caudate lobe surface |  |  |  |  |
| Lesser sac superior recess |  |  |  |  |
| Lesser sac inferior recess |  |  |  |  |
| Central diaphragm |  |  |  |  |
| 3 | Splenic surface |  |  |  |  |  |
| Tail of pancreas/splenic hilum |  |  |  |  |
| Left diaphragmatic peritoneum |  |  |  |  |
| Anterior surface of the stomach |  |  |  |  |
| Posterior surface of the stomach |  |  |  |  |
| 4 | Left colon |  |  |  |  |  |
| Left paracolic gutter |  |  |  |  |
| Left mesocolon |  |  |  |  |
| Left paracolic gutter |  |  |  |  |
| Splenic flexure of colon |  |  |  |  |
| 5 | Left pelvic peritoneum |  |  |  |  |  |
| Sigmoid colon |  |  |  |  |
| Sigmoid mesocolon |  |  |  |  |
| Appendices epiploicae |  |  |  |  |
| 6 | Uterus |  |  |  |  |  |
| Left fallopian tube |  |  |  |  |
| Left ovary |  |  |  |  |
| Right fallopian tube |  |  |  |  |
| Right ovary |  |  |  |  |
| Bladder |  |  |  |  |
| Pouch of Douglas |  |  |  |  |
| Rectosigmoid junction |  |  |  |  |
| 7 | Right pelvic peritoneum |  |  |  |  |  |
| Caecum |  |  |  |  |
| Appendix |  |  |  |  |
| Mesoappendix |  |  |  |  |
| 8 | Right colon |  |  |  |  |  |
| Right paracolic gutter |  |  |  |  |
| Right mesocolon |  |  |  |  |
| Appendices epliplicae |  |  |  |  |
| 9 | Proximal jejunal surface |  |  |  |  |  |
| Proximal jejunal surface (mesenteric) |  |  |  |  |
| Proximal mesojejunum |  |  |  |  |
| 10 | Distal jejunal surface |  |  |  |  |  |
| Distal jejunal surface (mesenteric) |  |  |  |  |
| Distal mesojejunum |  |  |  |  |
| 11 | Proximal ileal surface |  |  |  |  |  |
| Proximal ileal surface (mesenteric) |  |  |  |  |
| Proximal mesoileum |  |  |  |  |
| 12 | Distal ileal surface |  |  |  |  |  |
| Distal ileal surface (mesenteric) |  |  |  |  |
| Distal mesoileum |  |  |  |  |
| Total | | | | |  |  |

Table 3 Detailed Surgical PCI

| Region | Structure | Size of largest deposit | Post NACT  Scarring/ complete response/ Adhesion | Other deposits present/absent | Size of residual disease | Score (for the entire region) |
| --- | --- | --- | --- | --- | --- | --- |
| 0 | Midline incision |  |  |  |  |  |
| Anteroparietal peritoneum (Right) |  |  |  |  |
| Anteroparietal peritoneum (Left) |  |  |  |  |
| Greater omentum |  |  |  |  |
| Transverse colon |  |  |  |  |
| Transverse mesocolon |  |  |  |  |
| Gastrocolic ligament |  |  |  |  |
| 1 | Right hepatic surface |  |  |  |  |  |
| Diaphragm |  |  |  |  |
| Foramen of Winslow |  |  |  |  |
| Gall bladder |  |  |  |  |
| Hepatorenal recess |  |  |  |  |
| 2 | Left hepatic surface |  |  |  |  |  |
| Lesser omentum |  |  |  |  |
| Hepatic hilum |  |  |  |  |
| Falciform ligament |  |  |  |  |
| Caudate lobe surface |  |  |  |  |
| Lesser sac superior recess |  |  |  |  |
| Lesser sac inferior recess |  |  |  |  |
| Central diaphragm |  |  |  |  |
| 3 | Splenic surface |  |  |  |  |  |
| Tail of pancreas/splenic hilum |  |  |  |  |
| Left diaphragmatic peritoneum |  |  |  |  |
| Anterior surface of the stomach |  |  |  |  |
| Posterior surface of the stomach |  |  |  |  |
| 4 | Left colon |  |  |  |  |  |
| Left paracolic gutter |  |  |  |  |
| Left mesocolon |  |  |  |  |
| Left paracolic gutter |  |  |  |  |
| Splenic flexure of colon |  |  |  |  |
| 5 | Left pelvic peritoneum |  |  |  |  |  |
| Sigmoid colon |  |  |  |  |
| Sigmoid mesocolon |  |  |  |  |
| Appendices epiploicae |  |  |  |  |
| 6 | Uterus |  |  |  |  |  |
| Left fallopian tube |  |  |  |  |
| Left ovary |  |  |  |  |
| Right fallopian tube |  |  |  |  |
| Right ovary |  |  |  |  |
| Bladder |  |  |  |  |
| Pouch of Douglas |  |  |  |  |
| Rectosigmoid junction |  |  |  |  |
| 7 | Right pelvic peritoneum |  |  |  |  |  |
| Caecum |  |  |  |  |
| Appendix |  |  |  |  |
| Mesoappendix |  |  |  |  |
| 8 | Right colon |  |  |  |  |  |
| Right paracolic gutter |  |  |  |  |
| Right mesocolon |  |  |  |  |
| Appendices epliplicae |  |  |  |  |
| 9 | Proximal jejunal surface |  |  |  |  |  |
| Proximal jejunal surface (mesenteric) |  |  |  |  |
| Proximal mesojejunum |  |  |  |  |
| 10 | Distal jejunal surface |  |  |  |  |  |
| Distal jejunal surface (mesenteric) |  |  |  |  |
| Distal mesojejunum |  |  |  |  |
| 11 | Proximal ileal surface |  |  |  |  |  |
| Proximal ileal surface (mesenteric) |  |  |  |  |
| Proximal mesoileum |  |  |  |  |
| 12 | Distal ileal surface |  |  |  |  |  |
| Distal ileal surface (mesenteric) |  |  |  |  |
| Distal mesoileum |  |  |  |  |
| Total | | | | |  |  |

Table 4

Specimen list and grossing details

| No | Description | Tumor (present /absent) | Maximum  tumor diameter | No of sections taken | Section from normal peritoneum |
| --- | --- | --- | --- | --- | --- |
|  |  |  |  |  |  |
|  |  |  |  |  |  |
|  |  |  |  |  |  |
|  |  |  |  |  |  |
|  |  |  |  |  |  |
|  |  |  |  |  |  |
|  |  |  |  |  |  |
|  |  |  |  |  |  |
|  |  |  |  |  |  |
|  |  |  |  |  |  |
|  |  |  |  |  |  |
|  |  |  |  |  |  |
|  |  |  |  |  |  |
|  |  |  |  |  |  |
|  |  |  |  |  |  |
|  |  |  |  |  |  |
|  |  |  |  |  |  |
|  |  |  |  |  |  |

Table 5 Detailed pathological PCI

| Region | Structure | Size of largest deposit | Other deposits present/absent | No of sections taken | Presence of disease in normal peritoneum | Pathological regression grade | Score (for the entire region) |
| --- | --- | --- | --- | --- | --- | --- | --- |
| 0 | Midline incision |  |  |  |  |  |  |
| Anteroparietal peritoneum (Right) |  |  |  |  |  |
| Anteroparietal peritoneum (Left) |  |  |  |  |  |
| Greater omentum |  |  |  |  |  |
| Transverse colon |  |  |  |  |  |
| Transverse mesocolon |  |  |  |  |  |
| Gastrocolic ligament |  |  |  |  |  |
| 1 | Right hepatic surface |  |  |  |  |  |  |
| Diaphragm |  |  |  |  |  |
| Foramen of Winslow |  |  |  |  |  |
| Gall bladder |  |  |  |  |  |
| Hepatorenal recess |  |  |  |  |  |
| 2 | Left hepatic surface |  |  |  |  |  |  |
| Lesser omentum |  |  |  |  |  |
| Hepatic hilum |  |  |  |  |  |
| Falciform ligament |  |  |  |  |  |
| Caudate lobe surface |  |  |  |  |  |
| Lesser sac superior recess |  |  |  |  |  |
| Lesser sac inferior recess |  |  |  |  |  |
| Central diaphragm |  |  |  |  |  |
| 3 | Splenic surface |  |  |  |  |  |  |
| Tail of pancreas/splenic hilum |  |  |  |  |  |
| Left diaphragmatic peritoneum |  |  |  |  |  |
| Anterior surface of the stomach |  |  |  |  |  |
| Posterior surface of the stomach |  |  |  |  |  |
| 4 | Left colon |  |  |  |  |  |  |
| Left paracolic gutter |  |  |  |  |  |
| Left mesocolon |  |  |  |  |  |
| Left paracolic gutter |  |  |  |  |  |
| Splenic flexure of colon |  |  |  |  |  |
| 5 | Left pelvic peritoneum |  |  |  |  |  |  |
| Sigmoid colon |  |  |  |  |  |
| Sigmoid mesocolon |  |  |  |  |  |
| Appendices epiploicae |  |  |  |  |  |
| 6 | Uterus |  |  |  |  |  |  |
| Left fallopian tube |  |  |  |  |  |
| Left ovary |  |  |  |  |  |
| Right fallopian tube |  |  |  |  |  |
| Right ovary |  |  |  |  |  |
| Bladder |  |  |  |  |  |
| Pouch of Douglas |  |  |  |  |  |
| Rectosigmoid junction |  |  |  |  |  |
| 7 | Right pelvic peritoneum |  |  |  |  |  |  |
| Caecum |  |  |  |  |  |
| Appendix |  |  |  |  |  |
| Mesoappendix |  |  |  |  |  |
| 8 | Right colon |  |  |  |  |  |  |
| Right paracolic gutter |  |  |  |  |  |
| Right mesocolon |  |  |  |  |  |
| Appendices epliplicae |  |  |  |  |  |
| 9 | Proximal jejunal surface |  |  |  |  |  |  |
| Proximal jejunal surface (mesenteric) |  |  |  |  |  |
| Proximal meso jejunum |  |  |  |  |  |
| 10 | Distal jejunal surface |  |  |  |  |  |  |
| Distal jejunal surface (mesenteric) |  |  |  |  |  |
| Distal meso jejunum |  |  |  |  |  |
| 11 | Proximal ileal surface |  |  |  |  |  |  |
| Proximal ileal surface (mesenteric) |  |  |  |  |  |
| Proximal meso ileum |  |  |  |  |  |
| 12 | Distal ileal surface |  |  |  |  |  |  |
| Distal ileal surface (mesenteric) |  |  |  |  |  |
| Distal meso ileum |  |  |  |  |  |
| Total | | | | |  |  |  |
